# Supplementary material
Source: Royal Society of Chemistry journal article supplement (doi:10.1039/d5nr05367f)
Supplement: d5nr05367f1.pdf [file d5nr05367f1.pdf]

## SUPPLEMENTARY MATERIALS

### Multifunctional Green Pigment with UV Protection Based on Capping Agent-Engineered Cr-Doped Hydroxyapatite Nanoparticles

Natalya Kolokolova<sup>1</sup>, Evgeniya Syukkalova<sup>1</sup>, Lusine Voskanyan<sup>1</sup>, Artur Markarian<sup>1</sup>,  
Natalia Bobrysheva<sup>1</sup>, Mikhail Osmolowsky<sup>1</sup>, Dmitry Tkachenko<sup>1</sup>, Mikhail Voznesenskiy<sup>1</sup>,  
Olga Osmolovskaya<sup>1</sup>

<sup>1</sup>Saint Petersburg State University, 7/9 Universitetskaya Embankment, Saint Petersburg, Russian Federation, 199034

#### Corresponding Author

Dmitry Tkachenko

Email: dmitry.tka12@gmail.com

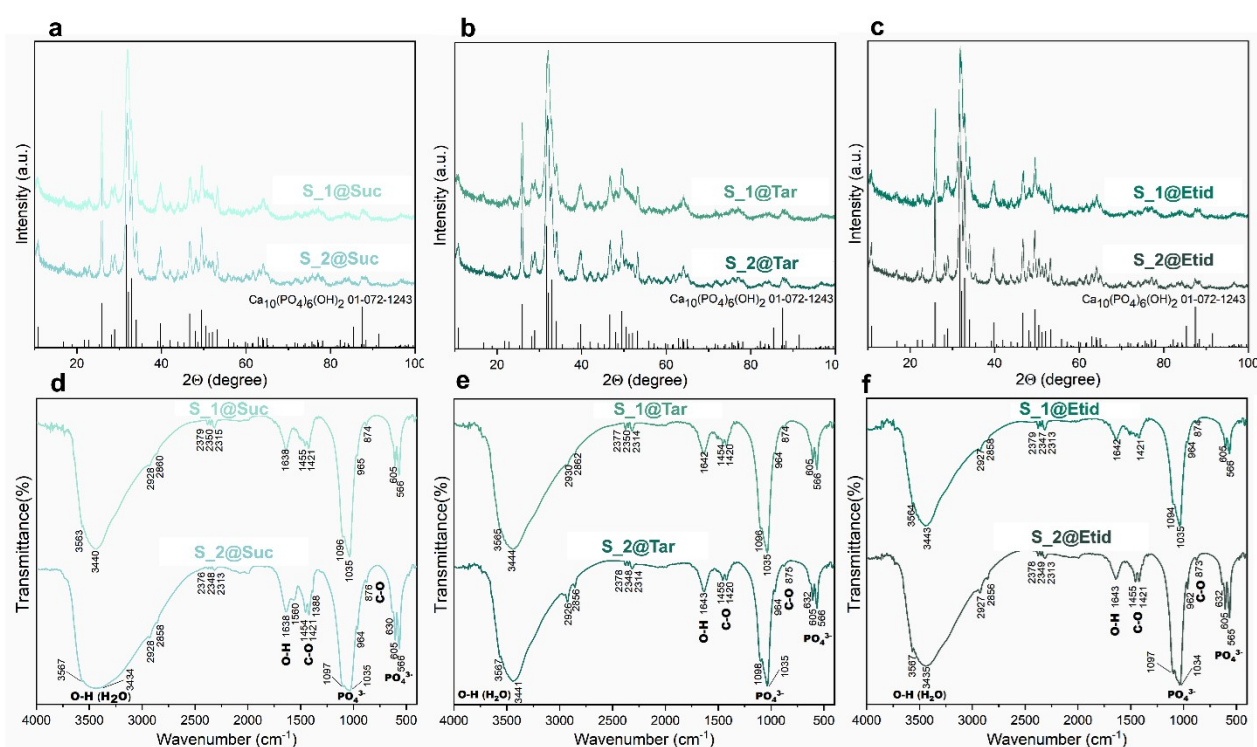

**Fig. SM1.** X-ray diffraction patterns of modified Cr-HAP modified with succinic (a), tartaric (b) and HEDP acids (c) (solid line—Ca<sub>10</sub>(PO<sub>4</sub>)<sub>6</sub>(OH)<sub>2</sub>; ICDD card #01-072-1243). FTIR spectra of modified Cr-HAP samples modified with succinic (d), tartaric (e) and HEDP acids (f).

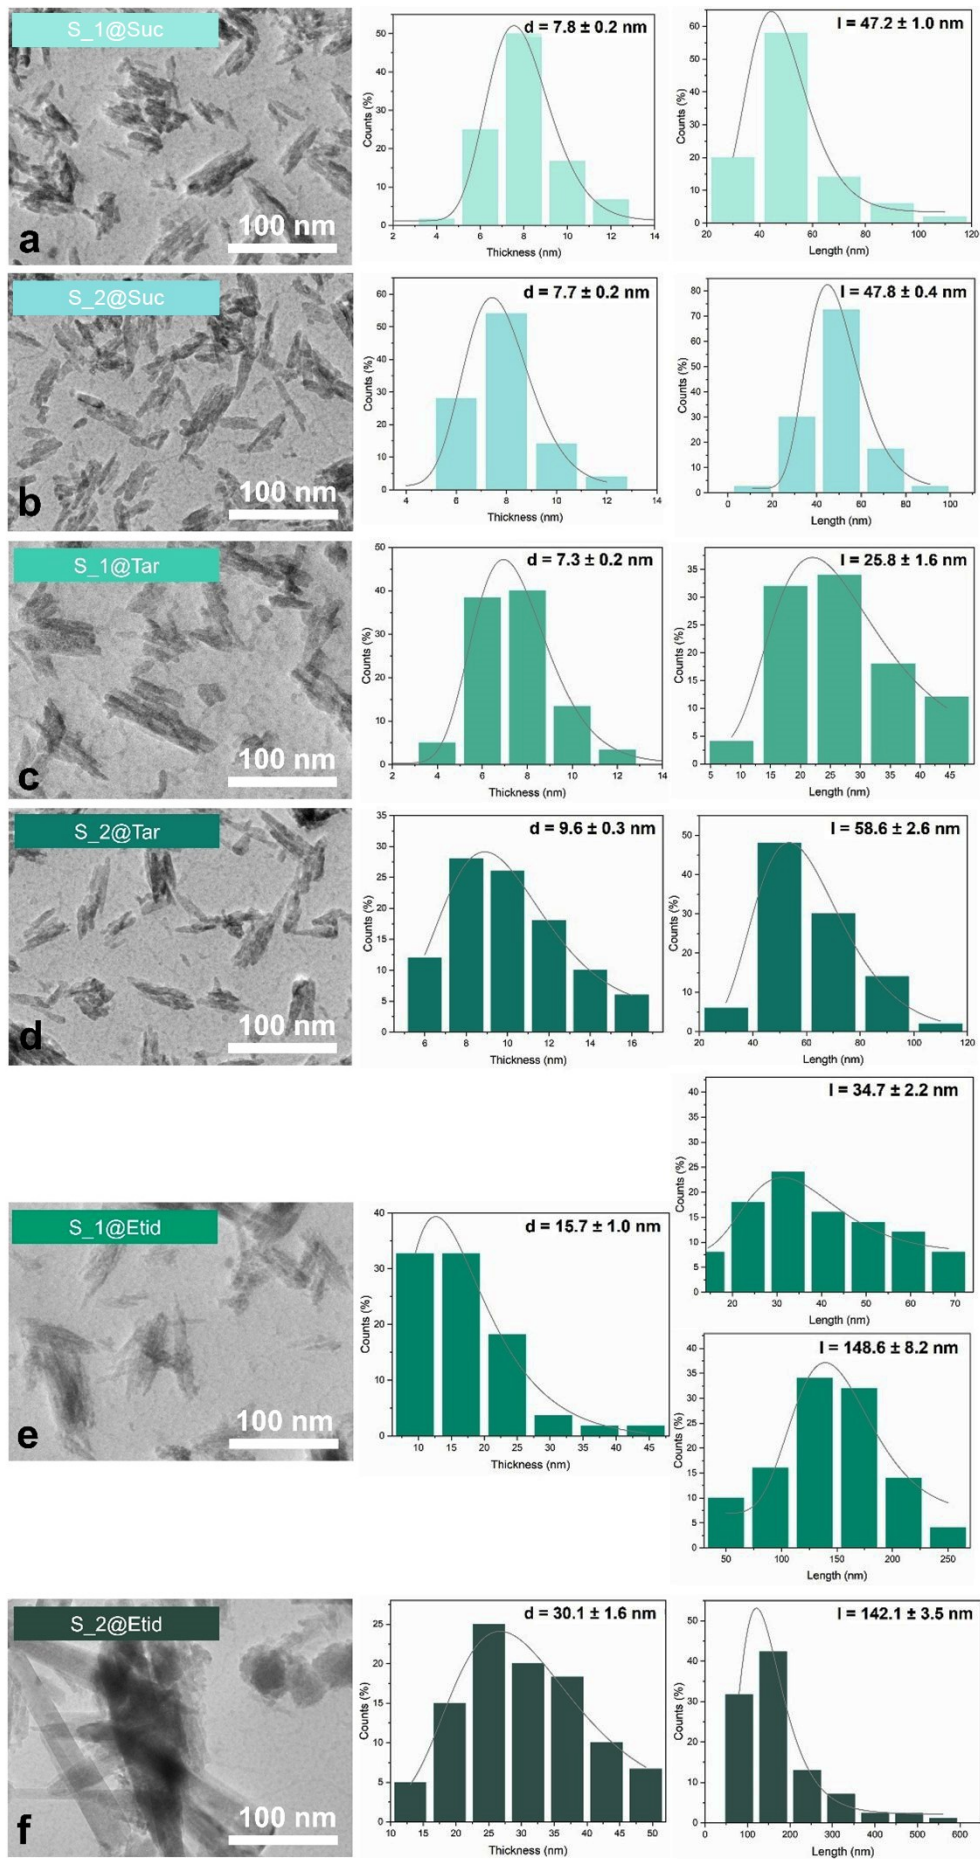

**Fig. SM2.** High-resolution TEM images, particle size distribution (diameter and thickness) of the samples. Row a: S\_1@Suc; row b: S\_2@Suc; row c: S\_1@Tar; row d: S\_2@Tar; row e: S\_1@Etid; row f: S\_2@Etid.

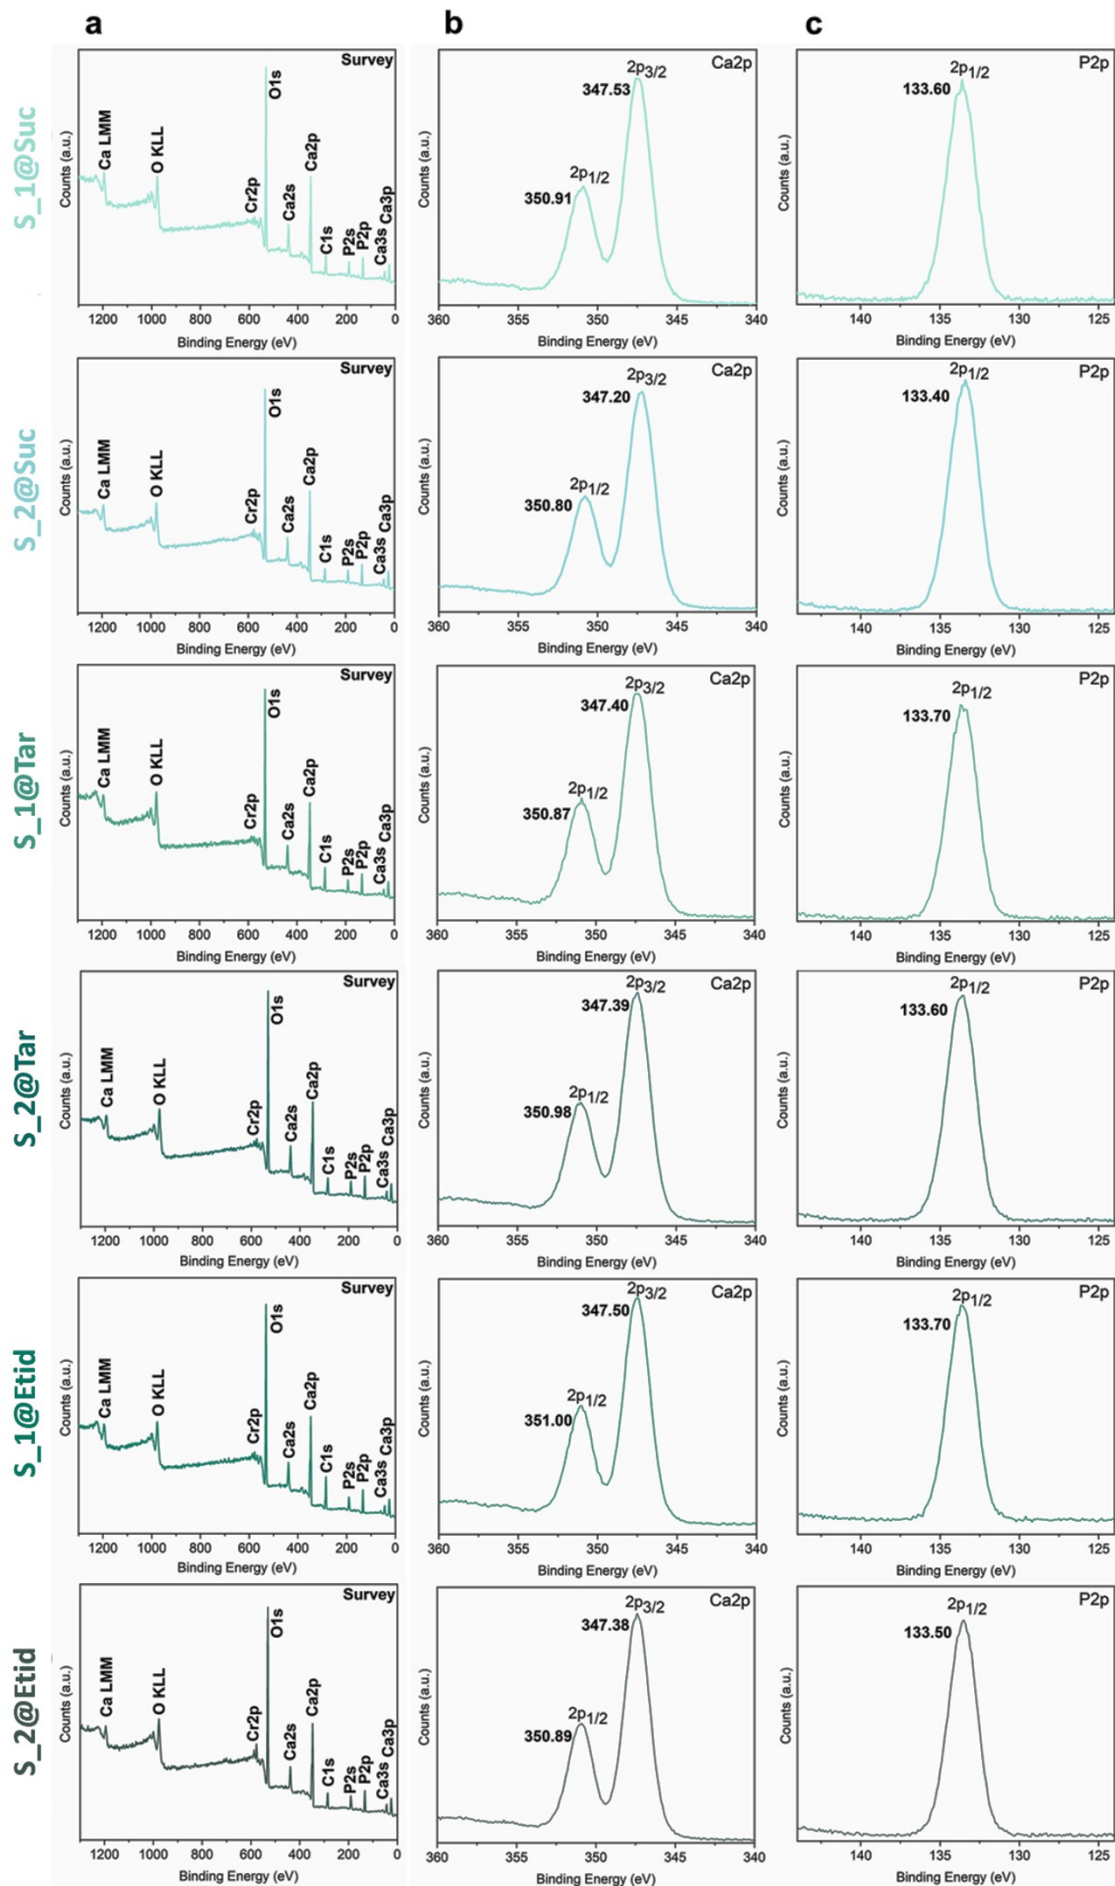

**Fig. SM3.** XPS survey spectra (column a), Ca1s (column b), and P2p (column c) of Cr-HAp nanoparticles modified with various organic acids.

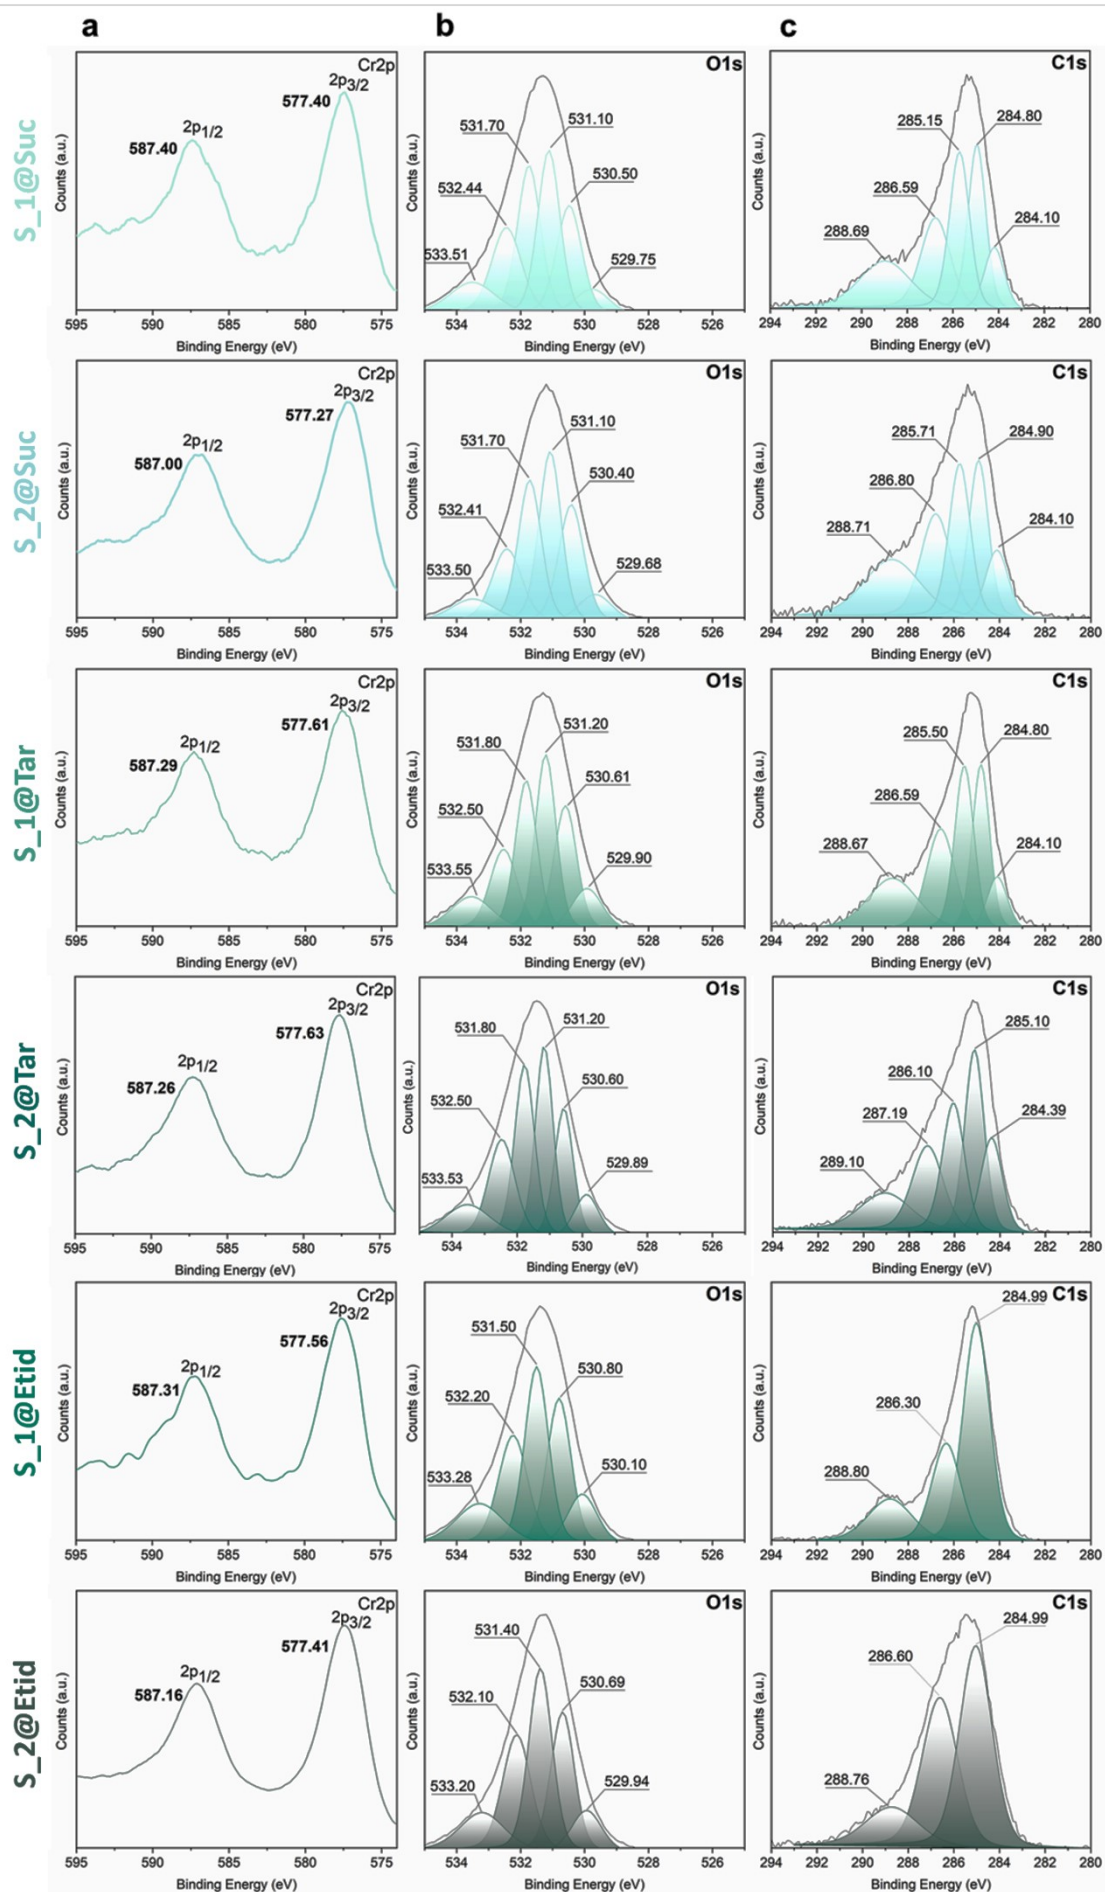

Fig. SM4. XPS spectra of Cr2p (column a), O1s (column b), and C1s (column c) of Cr-HAp nanoparticles modified with various organic acids.

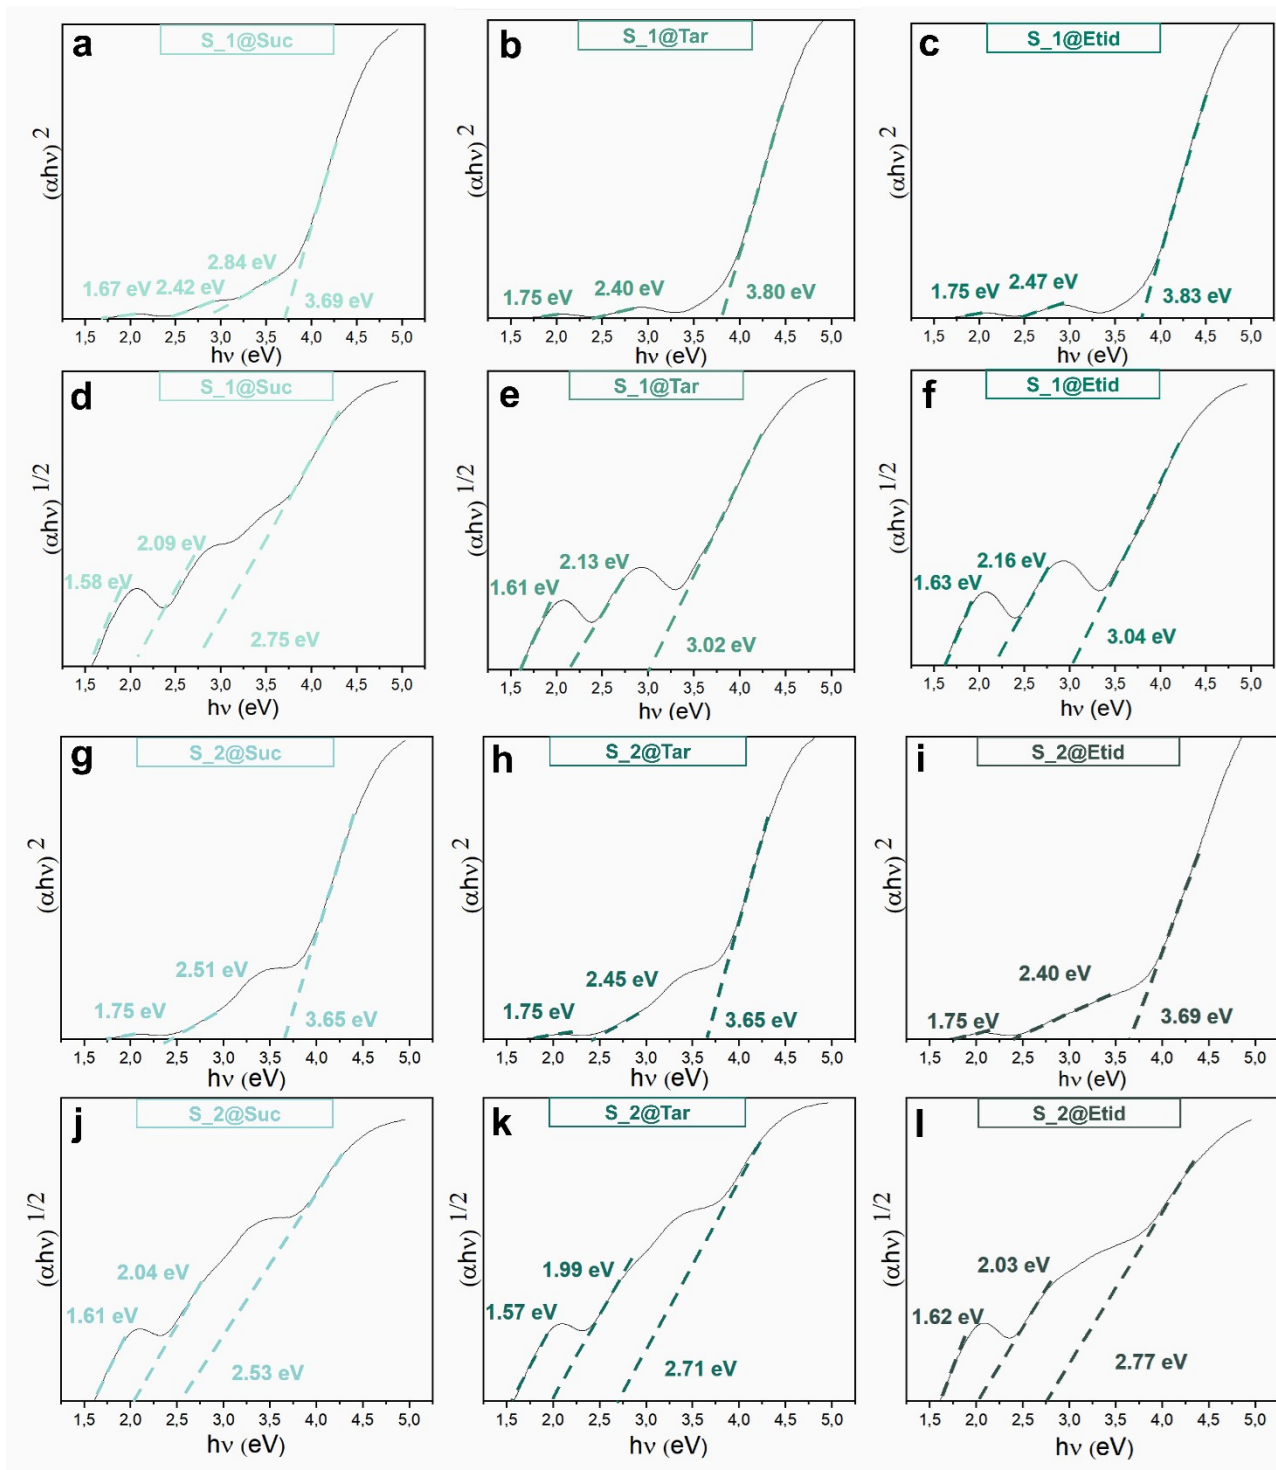

**Fig. SM5.** Tauc plots with band gap values of Cr-HAp samples: Cr-HAp@Suc (a, d), Cr-HAp@Tar (b, e), Cr-HAp@Etid (c, f), Cr-HAp@Suc<sub>180</sub> (g, j), Cr-HAp@Tar<sub>180</sub> (h, k), Cr-HAp@Etid<sub>180</sub> (i, l), obtained from optical absorption spectra.

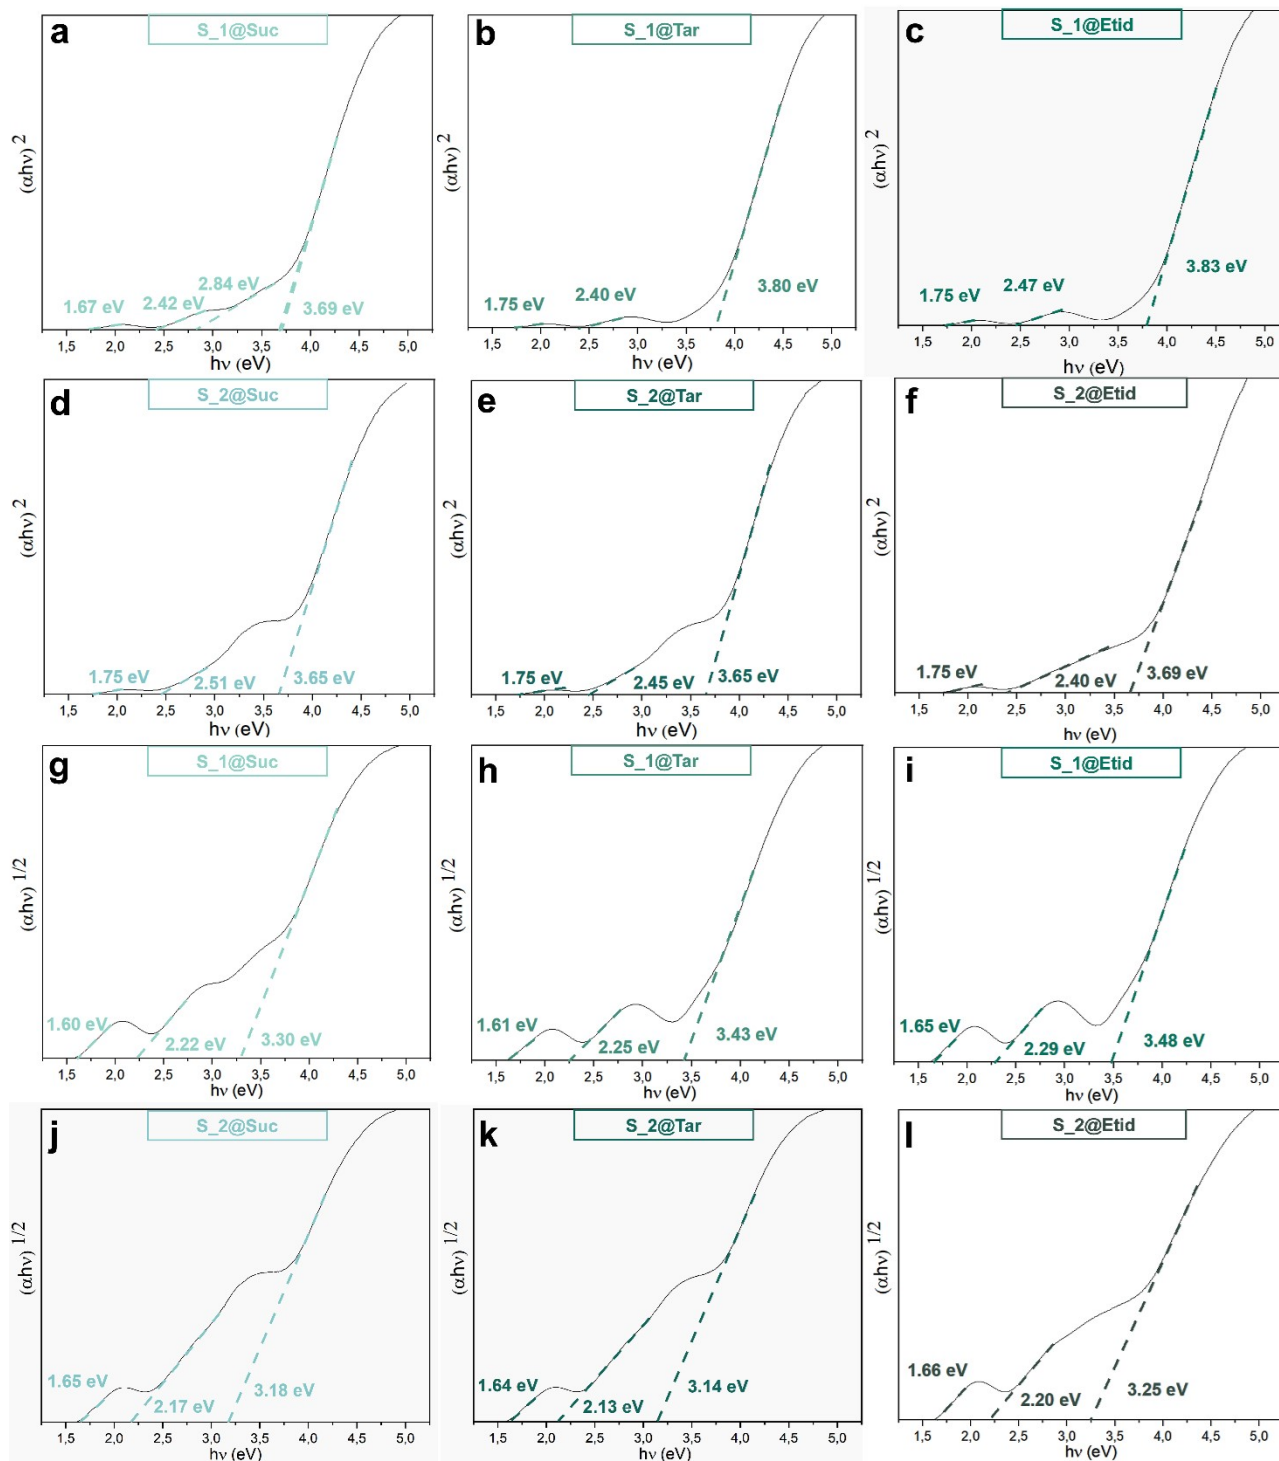

**Fig. SM6.** Kubelka-Munk plots with band gap values of Cr-Hap samples: Cr-Hap@Suc (a, d), Cr-Hap@Tar (b, e), Cr-Hap@Etid (c, f), Cr-Hap@Suc<sub>180</sub> (g, j), Cr-Hap@Tar<sub>180</sub> (h, k), Cr-Hap@Etid<sub>180</sub> (i, l), obtained from optical reflection spectra.

Table SM1. Direct and indirect electron transition energies obtained from Tauc and Kubelka-Munk plots.

| Sample   | Direct transitions (eV) |                    | Indirect transitions (eV) |                    |
|----------|-------------------------|--------------------|---------------------------|--------------------|
|          | Absorption spectra      | Reflection spectra | Absorption spectra        | Reflection spectra |
| S_0      | 4.08, 2.55, 1.81        | 4.26, 2.55, 1.84   | 3.40, 2.24, 1.67          | 3.77, 2.33, 1.67   |
| S_1@Suc  | 3.69, 2.84, 2.42, 1.67  | 2.75, 2.09, 1.58   | 3.80, 2.76, 2.41, 1.64    | 3.30, 2.22, 1.65   |
| S_2@Suc  | 3.65, 2.51, 1.75        | 2.53, 2.04, 1.61   | 3.78, 2.42, 1.78          | 3.17, 2.11, 1.63   |
| S_1@Tar  | 3.80, 2.40, 1.75        | 3.02, 2.13, 1.61   | 3.80, 2.41, 1.76          | 3.41, 2.24, 1.61   |
| S_2@Tar  | 3.65, 2.45, 1.75        | 2.71, 1.99, 1.57   | 3.75, 2.40, 1.74          | 3.06, 2.17, 1.62   |
| S_1@Etid | 3.83, 2.47, 1.75        | 3.04, 2.16, 1.63   | 3.86, 2.46, 1.75          | 3.47, 2.28, 1.66   |
| S_2@Etid | 3.69, 2.40, 1.75        | 2.77, 2.03, 1.62   | 3.81, 2.42, 1.73          | 3.42, 2.24, 1.69   |

Table SM2. Calculated surface-acid interaction energies for S\_0.

| Facet                        | 001  | 100  |
|------------------------------|------|------|
| <b>Suc</b><br><i>E</i> (eV)  | 82.5 | 42.9 |
| <b>Tar</b><br><i>E</i> (eV)  | 66.5 | 25.9 |
| <b>Etid</b><br><i>E</i> (eV) | 48.6 | 72.4 |

Table SM3. Hydrodynamic sizes (*HS*) and  $\zeta$ -potential ( $\zeta$ ) of modified Cr-HAp nanoparticles.

| Sample   | <i>HS</i> (nm) | $\zeta$ (mV) |
|----------|----------------|--------------|
| S_1      | 166            | -16.8        |
| S_1@Suc  | 277            | -16.7        |
| S_2@Suc  | 1296           | -6.2         |
| S_1@Tar  | 602            | -11.6        |
| S_2@Tar  | 2338           | -26.0        |
| S_1@Etid | 1919           | -12.7        |
| S_2@Etid | 391            | -35.6        |

Table SM4. Raw ICP-AES data of Cr doping levels.

| Sample   | Ca (mg/L)  | Cr (mg/L)   |
|----------|------------|-------------|
| S_1@Suc  | 71 ± 5     | 10.8 ± 0.3  |
| S_2@Suc  | 52 ± 4     | 6.6 ± 0.6   |
| S_1@Tar  | 49.0 ± 1.3 | 6.04 ± 0.28 |
| S_2@Tar  | 55 ± 8     | 7.08 ± 0.17 |
| S_1@Etid | 66 ± 6     | 9.6 ± 0.3   |
| S_2@Etid | 60 ± 5     | 8.2 ± 0.3   |

## **References**

Multifunctional Cosmetics. Cosmetic Science and Technology Series, Volume 26. Marcel Dekker Inc., 2001.
